# Supplementary material for: Gut microbiome modifications over time when removing in-feed antibiotics from the prophylaxis of post-weaning diarrhea in piglets
Source: PubMed Central journal article supplement (PMC8901073; doi:10.1371/journal.pone.0262199), 2022-03-07
Supplement: pone.0262199.s001.pdf [file pone.0262199.s001.pdf]

# Gut microbiome modifications over time when removing in-feed antibiotics from the prophylaxis of post-weaning diarrhea in piglets

Paola Cremonesi<sup>1</sup> et al.\*

<sup>1</sup> National Research Council, Institute of Biology and Biotechnology in Agriculture (CNR-IBBA), Milan, Italy

Paola Cremonesi and Filippo Biscarini contributed equally to this work.

\*E-mail: [filippo.biscarini@ibba.cnr.it](mailto:filippo.biscarini@ibba.cnr.it)

## Supplementary Material

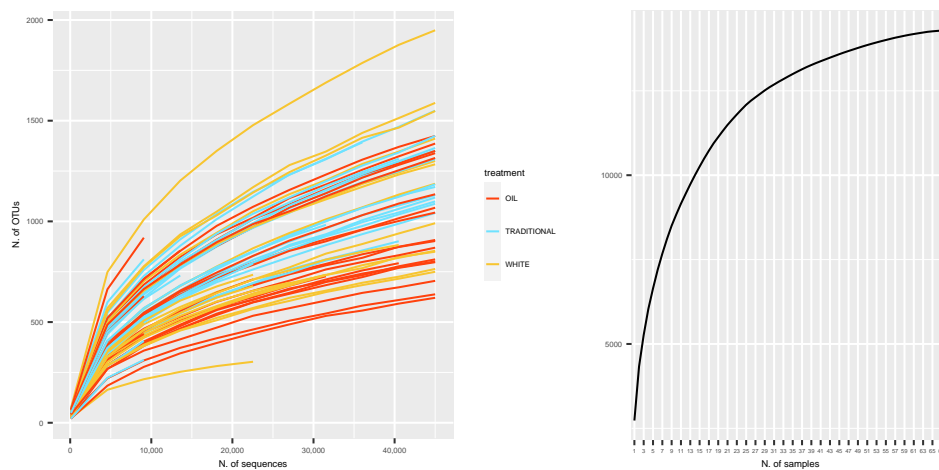

**S1 Figure 1. Rarefaction curves.** Sequence-based (left) and sample-based (right) rarefaction curves for the sampled gut microbiotas. Number of detected OTUs on the y-axis; number of sequences (left) and of samples (right) on the x-axis.
