# Supplementary material for: Gut microbiome modifications over time when removing in-feed antibiotics from the prophylaxis of post-weaning diarrhea in piglets
Source: PubMed Central journal article supplement (PMC8901073; doi:10.1371/journal.pone.0262199), 2022-03-07
Supplement: pone.0262199.s002.pdf [file pone.0262199.s002.pdf]

# Gut microbiome modifications over time when removing in-feed antibiotics from the prophylaxis of post-weaning diarrhea in piglets

Paola Cremonesi<sup>1</sup> et al.\*,

<sup>1</sup> National Research Council, Institute of Biology and Biotechnology in Agriculture (CNR-IBBA), Milan, Italy

✉ Paola Cremonesi and Filippo Biscarini contributed equally to this work.

\*E-mail: filippo.biscarini@ibba.cnr.it

## Supplementary Material

**S1 Table 1.** Average number of 16S rRNA-gene sequences (+/- standard deviation) per experimental group and timepoint

| treatment   | T0                | T1                 | T2                 | T3                 |
|-------------|-------------------|--------------------|--------------------|--------------------|
| oil         | 55367.2+/-21348.7 | 81026.8+/-51291.1  | 69871.3+/-59729.7  | 110015.2+/-37496.9 |
| traditional | 46274+/-31807.1   | 40654.8+/-26176.7  | 99087.8+/-77029.3  | 143167+/-61104.9   |
| white       | 27621.4+/-11270.9 | 97793.8+/-107045.6 | 110918.4+/-30251.9 | 153425+/-97899.7   |
