# Supplementary material for: Gut microbiome modifications over time when removing in-feed antibiotics from the prophylaxis of post-weaning diarrhea in piglets
Source: PubMed Central journal article supplement (PMC8901073; doi:10.1371/journal.pone.0262199), 2022-03-07
Supplement: pone.0262199.s003.pdf [file pone.0262199.s003.pdf]

# Gut microbiome modifications over time when removing in-feed antibiotics from the prophylaxis of post-weaning diarrhea in piglets

Paola Cremonesi<sup>1</sup>  et al.\*,

<sup>1</sup> National Research Council, Institute of Biology and Biotechnology in Agriculture (CNR-IBBA), Milan, Italy

 Paola Cremonesi and Filippo Biscarini contributed equally to this work.

\*E-mail: filippo.biscarini@ibba.cnr.it

## Supplementary Material

**Table S2.** Relative abundances of phyla in the piglet gut microbiota per treatment (diet group) and timepoint

| OTU            | Group       | T0        | T1        | T2        | T3        |
|----------------|-------------|-----------|-----------|-----------|-----------|
| Firmicutes     | OIL         | 0.3457007 | 0.4965781 | 0.6117502 | 0.5527304 |
| Firmicutes     | TRADITIONAL | 0.4781912 | 0.6000563 | 0.5184750 | 0.5933683 |
| Firmicutes     | WHITE       | 0.3999341 | 0.4909771 | 0.5766113 | 0.5489473 |
| Proteobacteria | OIL         | 0.3608533 | 0.1075891 | 0.0816246 | 0.0643048 |
| Proteobacteria | TRADITIONAL | 0.2305087 | 0.1245515 | 0.1340380 | 0.0573324 |
| Proteobacteria | WHITE       | 0.4234811 | 0.0995669 | 0.0679742 | 0.0643441 |
| Bacteroidetes  | OIL         | 0.1881828 | 0.3237184 | 0.1991300 | 0.3382592 |
| Bacteroidetes  | TRADITIONAL | 0.2200051 | 0.1849144 | 0.2623070 | 0.3047097 |
| Bacteroidetes  | WHITE       | 0.1089285 | 0.3338071 | 0.2879556 | 0.3388248 |
| Actinobacteria | OIL         | 0.0483121 | 0.0056372 | 0.0296781 | 0.0144163 |
| Actinobacteria | TRADITIONAL | 0.0387778 | 0.0506774 | 0.0297281 | 0.0167669 |
| Actinobacteria | WHITE       | 0.0411479 | 0.0109545 | 0.0148328 | 0.0138426 |
| Fusobacteria   | OIL         | 0.0530341 | 0.0477254 | 0.0134282 | 0.0023793 |
| Fusobacteria   | TRADITIONAL | 0.0264944 | 0.0130531 | 0.0208698 | 0.0015003 |
| Fusobacteria   | WHITE       | 0.0082892 | 0.0360510 | 0.0105268 | 0.0015393 |
| Spirochaetae   | OIL         | 0.0009475 | 0.0025469 | 0.0152098 | 0.0091067 |
| Spirochaetae   | TRADITIONAL | 0.0006836 | 0.0050867 | 0.0052183 | 0.0076053 |
| Spirochaetae   | WHITE       | 0.0052676 | 0.0063390 | 0.0106178 | 0.0080722 |
| Cyanobacteria  | OIL         | 0.0007371 | 0.0003559 | 0.0032601 | 0.0085698 |
| Cyanobacteria  | TRADITIONAL | 0.0015142 | 0.0014556 | 0.0026637 | 0.0112297 |
| Cyanobacteria  | WHITE       | 0.0026572 | 0.0039078 | 0.0076300 | 0.0106835 |
| Lentisphaerae  | OIL         | 0.0007167 | 0.0047319 | 0.0134218 | 0.0017623 |
| Lentisphaerae  | TRADITIONAL | 0.0020360 | 0.0034320 | 0.0048918 | 0.0000668 |
| Lentisphaerae  | WHITE       | 0.0017838 | 0.0049271 | 0.0071591 | 0.0020858 |
| Euryarchaeota  | OIL         | 0.0000000 | 0.0002693 | 0.0094821 | 0.0015976 |
| Euryarchaeota  | TRADITIONAL | 0.0000000 | 0.0062851 | 0.0035778 | 0.0012343 |
| Euryarchaeota  | WHITE       | 0.0039005 | 0.0016517 | 0.0031861 | 0.0025414 |
| Tenericutes    | OIL         | 0.0008688 | 0.0023627 | 0.0018763 | 0.0045327 |
| Tenericutes    | TRADITIONAL | 0.0005559 | 0.0015937 | 0.0013215 | 0.0058496 |

|                |             |           |           |           |           |
|----------------|-------------|-----------|-----------|-----------|-----------|
| Tenericutes    | WHITE       | 0.0021168 | 0.0008294 | 0.0018812 | 0.0041426 |
| Synergistetes  | OIL         | 0.0006468 | 0.0070049 | 0.0156025 | 0.0010191 |
| Synergistetes  | TRADITIONAL | 0.0012331 | 0.0067415 | 0.0134796 | 0.0001414 |
| Synergistetes  | WHITE       | 0.0009798 | 0.0092050 | 0.0071518 | 0.0010015 |
| Planctomycetes | OIL         | 0.0000000 | 0.0002227 | 0.0038124 | 0.0005162 |
| Planctomycetes | TRADITIONAL | 0.0000000 | 0.0021527 | 0.0026630 | 0.0000000 |
| Planctomycetes | WHITE       | 0.0011881 | 0.0009796 | 0.0015531 | 0.0006012 |
| Elusimicrobia  | OIL         | 0.0000000 | 0.0012574 | 0.0017239 | 0.0008056 |
| Elusimicrobia  | TRADITIONAL | 0.0000000 | 0.0000000 | 0.0007665 | 0.0001953 |
| Elusimicrobia  | WHITE       | 0.0003253 | 0.0008040 | 0.0029202 | 0.0033736 |
