# Supplementary material for: Gut microbiome modifications over time when removing in-feed antibiotics from the prophylaxis of post-weaning diarrhea in piglets
Source: PubMed Central journal article supplement (PMC8901073; doi:10.1371/journal.pone.0262199), 2022-03-07
Supplement: pone.0262199.s004.pdf [file pone.0262199.s004.pdf]

# Gut microbiome modifications over time when removing in-feed antibiotics from the prophylaxis of post-weaning diarrhea in piglets

Paola Cremonesi<sup>1</sup> et al.\*

<sup>1</sup> National Research Council, Institute of Biology and Biotechnology in Agriculture (CNR-IBBA), Milan, Italy

✉ Paola Cremonesi and Filippo Biscarini contributed equally to this work.

\*E-mail: filippo.biscarini@ibba.cnr.it

## Supplementary Material

**S3 Table.** Relative abundances of taxonomic levels (class, order, family, genus) in the piglet gut microbiota per treatment (diet group) and timepoint

| level | OTU                   | Group       | T0        | T1        | T2        | T3        |
|-------|-----------------------|-------------|-----------|-----------|-----------|-----------|
| class | Actinobacteria        | OIL         | 0.0328361 | 0.0023231 | 0.0130981 | 0.0041072 |
| class | Actinobacteria        | TRADITIONAL | 0.0226294 | 0.0341353 | 0.0165874 | 0.0048349 |
| class | Actinobacteria        | WHITE       | 0.0315033 | 0.0031762 | 0.0057967 | 0.0020594 |
| class | Bacilli               | OIL         | 0.1076515 | 0.0638553 | 0.0454990 | 0.0450303 |
| class | Bacilli               | TRADITIONAL | 0.0904687 | 0.0822586 | 0.0630952 | 0.0510976 |
| class | Bacilli               | WHITE       | 0.1261738 | 0.0589740 | 0.0456077 | 0.0314513 |
| class | Bacteroidia           | OIL         | 0.1785307 | 0.3323483 | 0.2120726 | 0.3496514 |
| class | Bacteroidia           | TRADITIONAL | 0.2209792 | 0.1847438 | 0.2728815 | 0.3119688 |
| class | Bacteroidia           | WHITE       | 0.0930576 | 0.3465481 | 0.3025608 | 0.3521925 |
| class | Betaproteobacteria    | OIL         | 0.0165464 | 0.0202716 | 0.0093557 | 0.0059228 |
| class | Betaproteobacteria    | TRADITIONAL | 0.0047951 | 0.0091201 | 0.0154085 | 0.0093440 |
| class | Betaproteobacteria    | WHITE       | 0.0158041 | 0.0146578 | 0.0148841 | 0.0065197 |
| class | Clostridia            | OIL         | 0.1764550 | 0.3406684 | 0.5511287 | 0.4037439 |
| class | Clostridia            | TRADITIONAL | 0.3331573 | 0.4875560 | 0.4040586 | 0.4608689 |
| class | Clostridia            | WHITE       | 0.2390117 | 0.3625813 | 0.4901629 | 0.4061235 |
| class | Coriobacteriia        | OIL         | 0.0172607 | 0.0034938 | 0.0190808 | 0.0108725 |
| class | Coriobacteriia        | TRADITIONAL | 0.0171635 | 0.0192430 | 0.0148610 | 0.0124656 |
| class | Coriobacteriia        | WHITE       | 0.0120700 | 0.0082849 | 0.0099526 | 0.0123957 |
| class | Epsilonproteobacteria | OIL         | 0.0124691 | 0.0138630 | 0.0188370 | 0.0234543 |
| class | Epsilonproteobacteria | TRADITIONAL | 0.0204606 | 0.0192547 | 0.0285064 | 0.0130317 |
| class | Epsilonproteobacteria | WHITE       | 0.0068308 | 0.0315069 | 0.0163495 | 0.0121459 |
| class | Erysipelotrichia      | OIL         | 0.0153744 | 0.0129767 | 0.0180424 | 0.0259360 |
| class | Erysipelotrichia      | TRADITIONAL | 0.0151635 | 0.0200713 | 0.0159902 | 0.0197035 |
| class | Erysipelotrichia      | WHITE       | 0.0152936 | 0.0138160 | 0.0129970 | 0.0237786 |
| class | Fusobacteriia         | OIL         | 0.0549933 | 0.0492466 | 0.0145598 | 0.0024723 |
| class | Fusobacteriia         | TRADITIONAL | 0.0271880 | 0.0137487 | 0.0220774 | 0.0015481 |
| class | Fusobacteriia         | WHITE       | 0.0087778 | 0.0377182 | 0.0111772 | 0.0016074 |
| class | Gammaproteobacteria   | OIL         | 0.3287344 | 0.0658958 | 0.0477597 | 0.0279802 |
| class | Gammaproteobacteria   | TRADITIONAL | 0.1959507 | 0.0877182 | 0.0805996 | 0.0335740 |

|        |                           |             |           |           |           |           |
|--------|---------------------------|-------------|-----------|-----------|-----------|-----------|
| class  | Gammaproteobacteria       | WHITE       | 0.4084487 | 0.0442366 | 0.0262717 | 0.0386671 |
| class  | Negativicutes             | OIL         | 0.0589904 | 0.0949049 | 0.0486288 | 0.0996211 |
| class  | Negativicutes             | TRADITIONAL | 0.0519207 | 0.0421502 | 0.0653333 | 0.0805835 |
| class  | Negativicutes             | WHITE       | 0.0430286 | 0.0783120 | 0.0634715 | 0.1118821 |
| order  | Bacteroidales             | OIL         | 0.2014584 | 0.3375605 | 0.2170461 | 0.3590440 |
| order  | Bacteroidales             | TRADITIONAL | 0.2324335 | 0.1957191 | 0.2824942 | 0.3182333 |
| order  | Bacteroidales             | WHITE       | 0.1089191 | 0.3538678 | 0.3084888 | 0.3614145 |
| order  | Burkholderiales           | OIL         | 0.0150974 | 0.0196209 | 0.0086183 | 0.0059404 |
| order  | Burkholderiales           | TRADITIONAL | 0.0040391 | 0.0089702 | 0.0147176 | 0.0090523 |
| order  | Burkholderiales           | WHITE       | 0.0163209 | 0.0147435 | 0.0140547 | 0.0065970 |
| order  | Campylobacterales         | OIL         | 0.0140704 | 0.0140804 | 0.0192787 | 0.0240843 |
| order  | Campylobacterales         | TRADITIONAL | 0.0215211 | 0.0203986 | 0.0295106 | 0.0132934 |
| order  | Campylobacterales         | WHITE       | 0.0079951 | 0.0321724 | 0.0166698 | 0.0124639 |
| order  | Clostridiales             | OIL         | 0.1991162 | 0.3460111 | 0.5640537 | 0.4145896 |
| order  | Clostridiales             | TRADITIONAL | 0.3504263 | 0.5165207 | 0.4182922 | 0.4701234 |
| order  | Clostridiales             | WHITE       | 0.2797509 | 0.3702396 | 0.4997666 | 0.4167577 |
| order  | Coriobacteriales          | OIL         | 0.0194774 | 0.0035486 | 0.0195283 | 0.0111646 |
| order  | Coriobacteriales          | TRADITIONAL | 0.0180532 | 0.0203862 | 0.0153845 | 0.0127160 |
| order  | Coriobacteriales          | WHITE       | 0.0141273 | 0.0084599 | 0.0101476 | 0.0127203 |
| order  | Enterobacteriales         | OIL         | 0.2740552 | 0.0325504 | 0.0285704 | 0.0047373 |
| order  | Enterobacteriales         | TRADITIONAL | 0.1697565 | 0.0696352 | 0.0562080 | 0.0166199 |
| order  | Enterobacteriales         | WHITE       | 0.3316343 | 0.0114754 | 0.0076727 | 0.0104791 |
| order  | Erysipelotrichales        | OIL         | 0.0173488 | 0.0131802 | 0.0184656 | 0.0266327 |
| order  | Erysipelotrichales        | TRADITIONAL | 0.0159494 | 0.0212637 | 0.0165535 | 0.0200992 |
| order  | Erysipelotrichales        | WHITE       | 0.0179004 | 0.0141078 | 0.0132517 | 0.0244012 |
| order  | Fusobacteriales           | OIL         | 0.0620558 | 0.0500189 | 0.0149012 | 0.0025387 |
| order  | Fusobacteriales           | TRADITIONAL | 0.0285973 | 0.0145655 | 0.0228552 | 0.0015792 |
| order  | Fusobacteriales           | WHITE       | 0.0102739 | 0.0385149 | 0.0113962 | 0.0016495 |
| order  | Lactobacillales           | OIL         | 0.0968672 | 0.0630188 | 0.0412996 | 0.0440663 |
| order  | Lactobacillales           | TRADITIONAL | 0.0867112 | 0.0754674 | 0.0588442 | 0.0488758 |
| order  | Lactobacillales           | WHITE       | 0.1074809 | 0.0567322 | 0.0422274 | 0.0304764 |
| order  | Pasteurellales            | OIL         | 0.0326536 | 0.0227720 | 0.0101449 | 0.0033578 |
| order  | Pasteurellales            | TRADITIONAL | 0.0145829 | 0.0067273 | 0.0121511 | 0.0060589 |
| order  | Pasteurellales            | WHITE       | 0.0537169 | 0.0163780 | 0.0077178 | 0.0067185 |
| order  | Selenomonadales           | OIL         | 0.0665663 | 0.0963933 | 0.0497693 | 0.1022972 |
| order  | Selenomonadales           | TRADITIONAL | 0.0546119 | 0.0446543 | 0.0676347 | 0.0822016 |
| order  | Selenomonadales           | WHITE       | 0.0503627 | 0.0799661 | 0.0647151 | 0.1148117 |
| family | Acidaminococcaceae        | OIL         | 0.0262223 | 0.0438282 | 0.0279671 | 0.0247565 |
| family | Acidaminococcaceae        | TRADITIONAL | 0.0228512 | 0.0296590 | 0.0334536 | 0.0299558 |
| family | Acidaminococcaceae        | WHITE       | 0.0153070 | 0.0372932 | 0.0285698 | 0.0313233 |
| family | Bacteroidaceae            | OIL         | 0.1380044 | 0.0532346 | 0.0513782 | 0.0096353 |
| family | Bacteroidaceae            | TRADITIONAL | 0.1171100 | 0.0755544 | 0.0821112 | 0.0076364 |
| family | Bacteroidaceae            | WHITE       | 0.0217453 | 0.0780370 | 0.0291851 | 0.0082274 |
| family | Bacteroidales S24-7 group | OIL         | 0.0064988 | 0.0392185 | 0.0263543 | 0.0373217 |
| family | Bacteroidales S24-7 group | TRADITIONAL | 0.0203441 | 0.0130599 | 0.0301409 | 0.0272994 |
| family | Bacteroidales S24-7 group | WHITE       | 0.0184228 | 0.0269616 | 0.0415924 | 0.0444582 |
| family | Christensenellaceae       | OIL         | 0.0024749 | 0.0069854 | 0.0631851 | 0.0096181 |
| family | Christensenellaceae       | TRADITIONAL | 0.0105403 | 0.0547403 | 0.0342412 | 0.0027404 |
| family | Christensenellaceae       | WHITE       | 0.0202560 | 0.0089354 | 0.0256313 | 0.0126361 |
| family | Clostridiaceae 1          | OIL         | 0.0439347 | 0.0037043 | 0.0155107 | 0.0090509 |

|        |                                       |             |           |           |           |           |
|--------|---------------------------------------|-------------|-----------|-----------|-----------|-----------|
| family | Clostridiaceae 1                      | TRADITIONAL | 0.0410246 | 0.0280880 | 0.0181278 | 0.0090095 |
| family | Clostridiaceae 1                      | WHITE       | 0.0181685 | 0.0090040 | 0.0048339 | 0.0108903 |
| family | Coriobacteriaceae                     | OIL         | 0.0215694 | 0.0037984 | 0.0211363 | 0.0115589 |
| family | Coriobacteriaceae                     | TRADITIONAL | 0.0197340 | 0.0219947 | 0.0166267 | 0.0130625 |
| family | Coriobacteriaceae                     | WHITE       | 0.0152041 | 0.0092074 | 0.0106971 | 0.0129632 |
| family | Enterobacteriaceae                    | OIL         | 0.3034904 | 0.0348412 | 0.0309229 | 0.0049046 |
| family | Enterobacteriaceae                    | TRADITIONAL | 0.1855615 | 0.0751296 | 0.0607464 | 0.0170729 |
| family | Enterobacteriaceae                    | WHITE       | 0.3569116 | 0.0124893 | 0.0080881 | 0.0106793 |
| family | Erysipelotrichaceae                   | OIL         | 0.0192122 | 0.0141078 | 0.0199860 | 0.0275735 |
| family | Erysipelotrichaceae                   | TRADITIONAL | 0.0174344 | 0.0229414 | 0.0178901 | 0.0206470 |
| family | Erysipelotrichaceae                   | WHITE       | 0.0192647 | 0.0153543 | 0.0139692 | 0.0248673 |
| family | Family XIII                           | OIL         | 0.0025370 | 0.0118839 | 0.0181460 | 0.0124680 |
| family | Family XIII                           | TRADITIONAL | 0.0068461 | 0.0138143 | 0.0144144 | 0.0091769 |
| family | Family XIII                           | WHITE       | 0.0128671 | 0.0110615 | 0.0178216 | 0.0092123 |
| family | Fusobacteriaceae                      | OIL         | 0.0388841 | 0.0308548 | 0.0110211 | 0.0015872 |
| family | Fusobacteriaceae                      | TRADITIONAL | 0.0196085 | 0.0100814 | 0.0145789 | 0.0009415 |
| family | Fusobacteriaceae                      | WHITE       | 0.0054873 | 0.0247967 | 0.0074142 | 0.0009556 |
| family | Lachnospiraceae                       | OIL         | 0.1024561 | 0.1567410 | 0.1849989 | 0.1568650 |
| family | Lachnospiraceae                       | TRADITIONAL | 0.1779105 | 0.2188820 | 0.1786714 | 0.1777508 |
| family | Lachnospiraceae                       | WHITE       | 0.0988405 | 0.1955990 | 0.2281095 | 0.1532517 |
| family | Lactobacillaceae                      | OIL         | 0.0338827 | 0.0596697 | 0.0224183 | 0.0384835 |
| family | Lactobacillaceae                      | TRADITIONAL | 0.0414368 | 0.0424678 | 0.0352269 | 0.0403540 |
| family | Lactobacillaceae                      | WHITE       | 0.0421764 | 0.0451820 | 0.0327779 | 0.0252822 |
| family | Pasteurellaceae                       | OIL         | 0.0361608 | 0.0243746 | 0.0109802 | 0.0034764 |
| family | Pasteurellaceae                       | TRADITIONAL | 0.0159406 | 0.0072581 | 0.0131322 | 0.0062241 |
| family | Pasteurellaceae                       | WHITE       | 0.0578113 | 0.0178250 | 0.0081357 | 0.0068468 |
| family | Porphyromonadaceae                    | OIL         | 0.0479423 | 0.0406378 | 0.0361208 | 0.0099243 |
| family | Porphyromonadaceae                    | TRADITIONAL | 0.0489367 | 0.0580596 | 0.0519983 | 0.0101032 |
| family | Porphyromonadaceae                    | WHITE       | 0.0113472 | 0.0457411 | 0.0331068 | 0.0106740 |
| family | Prevotellaceae                        | OIL         | 0.0266624 | 0.2026728 | 0.0836262 | 0.2902005 |
| family | Prevotellaceae                        | TRADITIONAL | 0.0449762 | 0.0281538 | 0.1140188 | 0.2667601 |
| family | Prevotellaceae                        | WHITE       | 0.0517812 | 0.2086538 | 0.1930303 | 0.2789892 |
| family | Rikenellaceae                         | OIL         | 0.0037888 | 0.0214271 | 0.0299050 | 0.0193177 |
| family | Rikenellaceae                         | TRADITIONAL | 0.0222924 | 0.0354518 | 0.0242841 | 0.0107626 |
| family | Rikenellaceae                         | WHITE       | 0.0098460 | 0.0220828 | 0.0239054 | 0.0215193 |
| family | Ruminococcaceae                       | OIL         | 0.0405008 | 0.1781685 | 0.2905015 | 0.2303390 |
| family | Ruminococcaceae                       | TRADITIONAL | 0.1067064 | 0.2120460 | 0.1847388 | 0.2709194 |
| family | Ruminococcaceae                       | WHITE       | 0.1222816 | 0.1601894 | 0.2322537 | 0.2278792 |
| family | Streptococcaceae                      | OIL         | 0.0343389 | 0.0055598 | 0.0149309 | 0.0053567 |
| family | Streptococcaceae                      | TRADITIONAL | 0.0259099 | 0.0209958 | 0.0221507 | 0.0057483 |
| family | Streptococcaceae                      | WHITE       | 0.0331112 | 0.0104602 | 0.0078060 | 0.0048587 |
| family | Veillonellaceae                       | OIL         | 0.0474936 | 0.0593492 | 0.0259002 | 0.0811543 |
| family | Veillonellaceae                       | TRADITIONAL | 0.0368453 | 0.0185186 | 0.0396422 | 0.0544861 |
| family | Veillonellaceae                       | WHITE       | 0.0388944 | 0.0497383 | 0.0396493 | 0.0856815 |
| genus  | [Eubacterium] coprostanoligenes group | OIL         | 0.0057538 | 0.0206322 | 0.0411418 | 0.0282824 |
| genus  | [Eubacterium] coprostanoligenes group | TRADITIONAL | 0.0192088 | 0.0337223 | 0.0295013 | 0.0290619 |
| genus  | [Eubacterium] coprostanoligenes group | WHITE       | 0.0220385 | 0.0202686 | 0.0529907 | 0.0349453 |
| genus  | Alloprevotella                        | OIL         | 0.0088581 | 0.0286417 | 0.0156199 | 0.0350291 |
| genus  | Alloprevotella                        | TRADITIONAL | 0.0141675 | 0.0086413 | 0.0165580 | 0.0340825 |
| genus  | Alloprevotella                        | WHITE       | 0.0111386 | 0.0295940 | 0.0282983 | 0.0311968 |

|       |                               |             |           |           |           |           |
|-------|-------------------------------|-------------|-----------|-----------|-----------|-----------|
| genus | Bacteroides                   | OIL         | 0.1869325 | 0.0744185 | 0.0756928 | 0.0142244 |
| genus | Bacteroides                   | TRADITIONAL | 0.1623057 | 0.1109296 | 0.1158739 | 0.0108971 |
| genus | Bacteroides                   | WHITE       | 0.0321749 | 0.1121814 | 0.0446945 | 0.0121033 |
| genus | Blautia                       | OIL         | 0.0101330 | 0.0157365 | 0.0327980 | 0.0213935 |
| genus | Blautia                       | TRADITIONAL | 0.0317614 | 0.0286738 | 0.0252629 | 0.0302174 |
| genus | Blautia                       | WHITE       | 0.0141309 | 0.0148374 | 0.0190350 | 0.0180473 |
| genus | Christensenellaceae R-7 group | OIL         | 0.0033524 | 0.0097651 | 0.0919750 | 0.0135345 |
| genus | Christensenellaceae R-7 group | TRADITIONAL | 0.0140300 | 0.0785273 | 0.0468958 | 0.0038079 |
| genus | Christensenellaceae R-7 group | WHITE       | 0.0296367 | 0.0125343 | 0.0390529 | 0.0178354 |
| genus | Clostridium sensu stricto 1   | OIL         | 0.0497572 | 0.0038079 | 0.0191741 | 0.0105913 |
| genus | Clostridium sensu stricto 1   | TRADITIONAL | 0.0438012 | 0.0362876 | 0.0221382 | 0.0098594 |
| genus | Clostridium sensu stricto 1   | WHITE       | 0.0236039 | 0.0102629 | 0.0036814 | 0.0129417 |
| genus | Escherichia-Shigella          | OIL         | 0.3130406 | 0.0393808 | 0.0364677 | 0.0056628 |
| genus | Escherichia-Shigella          | TRADITIONAL | 0.1944597 | 0.0831282 | 0.0685755 | 0.0196678 |
| genus | Escherichia-Shigella          | WHITE       | 0.4311491 | 0.0137473 | 0.0096131 | 0.0120179 |
| genus | Faecalibacterium              | OIL         | 0.0010094 | 0.0314292 | 0.0077423 | 0.0504332 |
| genus | Faecalibacterium              | TRADITIONAL | 0.0064970 | 0.0053787 | 0.0072649 | 0.1141794 |
| genus | Faecalibacterium              | WHITE       | 0.0090240 | 0.0266048 | 0.0242205 | 0.0508516 |
| genus | Fusobacterium                 | OIL         | 0.0515960 | 0.0423931 | 0.0162368 | 0.0023431 |
| genus | Fusobacterium                 | TRADITIONAL | 0.0271759 | 0.0148015 | 0.0204074 | 0.0013435 |
| genus | Fusobacterium                 | WHITE       | 0.0078170 | 0.0350721 | 0.0112322 | 0.0014058 |
| genus | Lachnoclostridium             | OIL         | 0.0301203 | 0.0300900 | 0.0367139 | 0.0157710 |
| genus | Lachnoclostridium             | TRADITIONAL | 0.0642936 | 0.0580594 | 0.0462092 | 0.0181289 |
| genus | Lachnoclostridium             | WHITE       | 0.0068661 | 0.0394057 | 0.0315969 | 0.0162599 |
| genus | Lachnospiraceae NK4A136 group | OIL         | 0.0044424 | 0.0134203 | 0.0265051 | 0.0150275 |
| genus | Lachnospiraceae NK4A136 group | TRADITIONAL | 0.0106720 | 0.0303072 | 0.0205796 | 0.0181855 |
| genus | Lachnospiraceae NK4A136 group | WHITE       | 0.0160856 | 0.0232363 | 0.0367186 | 0.0180144 |
| genus | Lactobacillus                 | OIL         | 0.0455650 | 0.0834144 | 0.0324027 | 0.0559988 |
| genus | Lactobacillus                 | TRADITIONAL | 0.0568207 | 0.0614458 | 0.0489705 | 0.0561342 |
| genus | Lactobacillus                 | WHITE       | 0.0611738 | 0.0646578 | 0.0492128 | 0.0369605 |
| genus | Megasphaera                   | OIL         | 0.0198835 | 0.0146209 | 0.0145067 | 0.0283687 |
| genus | Megasphaera                   | TRADITIONAL | 0.0107288 | 0.0066400 | 0.0152888 | 0.0167443 |
| genus | Megasphaera                   | WHITE       | 0.0101274 | 0.0188712 | 0.0169414 | 0.0252635 |
| genus | Parabacteroides               | OIL         | 0.0328732 | 0.0325503 | 0.0324539 | 0.0136316 |
| genus | Parabacteroides               | TRADITIONAL | 0.0348752 | 0.0539920 | 0.0402547 | 0.0132784 |
| genus | Parabacteroides               | WHITE       | 0.0114168 | 0.0370978 | 0.0373620 | 0.0145326 |
| genus | Phascolarctobacterium         | OIL         | 0.0260280 | 0.0571185 | 0.0366093 | 0.0300374 |
| genus | Phascolarctobacterium         | TRADITIONAL | 0.0287561 | 0.0418296 | 0.0434741 | 0.0361187 |
| genus | Phascolarctobacterium         | WHITE       | 0.0184501 | 0.0489562 | 0.0367322 | 0.0375033 |
| genus | Prevotella 1                  | OIL         | 0.0011130 | 0.0156001 | 0.0094529 | 0.0209053 |
| genus | Prevotella 1                  | TRADITIONAL | 0.0021212 | 0.0015697 | 0.0184758 | 0.0362448 |
| genus | Prevotella 1                  | WHITE       | 0.0051651 | 0.0247830 | 0.0336293 | 0.0297362 |
| genus | Prevotella 2                  | OIL         | 0.0029789 | 0.1005112 | 0.0346972 | 0.0596027 |
| genus | Prevotella 2                  | TRADITIONAL | 0.0158437 | 0.0101039 | 0.0258002 | 0.0456622 |
| genus | Prevotella 2                  | WHITE       | 0.0137778 | 0.0772362 | 0.0586866 | 0.0476773 |
| genus | Prevotella 7                  | OIL         | 0.0030692 | 0.0206659 | 0.0100683 | 0.0429665 |
| genus | Prevotella 7                  | TRADITIONAL | 0.0031203 | 0.0031179 | 0.0105027 | 0.0268080 |
| genus | Prevotella 7                  | WHITE       | 0.0071902 | 0.0192538 | 0.0148771 | 0.0407536 |
| genus | Prevotella 9                  | OIL         | 0.0107175 | 0.0606036 | 0.0189009 | 0.1696287 |
| genus | Prevotella 9                  | TRADITIONAL | 0.0077760 | 0.0078026 | 0.0448089 | 0.1584636 |

|       |                             |             |           |           |           |           |
|-------|-----------------------------|-------------|-----------|-----------|-----------|-----------|
| genus | Prevotella 9                | WHITE       | 0.0142788 | 0.0785946 | 0.0721412 | 0.1580341 |
| genus | Prevotellaceae NK3B31 group | OIL         | 0.0021846 | 0.0185410 | 0.0121374 | 0.0337821 |
| genus | Prevotellaceae NK3B31 group | TRADITIONAL | 0.0135805 | 0.0038584 | 0.0242617 | 0.0333039 |
| genus | Prevotellaceae NK3B31 group | WHITE       | 0.0107084 | 0.0299623 | 0.0389192 | 0.0392521 |
| genus | Rikenellaceae RC9 gut group | OIL         | 0.0018987 | 0.0170154 | 0.0243288 | 0.0259902 |
| genus | Rikenellaceae RC9 gut group | TRADITIONAL | 0.0149248 | 0.0154815 | 0.0130422 | 0.0148875 |
| genus | Rikenellaceae RC9 gut group | WHITE       | 0.0116584 | 0.0146101 | 0.0210457 | 0.0296800 |
| genus | Ruminiclostridium 9         | OIL         | 0.0034419 | 0.0229819 | 0.0300297 | 0.0152573 |
| genus | Ruminiclostridium 9         | TRADITIONAL | 0.0089605 | 0.0230013 | 0.0182085 | 0.0211936 |
| genus | Ruminiclostridium 9         | WHITE       | 0.0047206 | 0.0216331 | 0.0203844 | 0.0153694 |
| genus | Ruminococcaceae UCG-002     | OIL         | 0.0021210 | 0.0249107 | 0.0475921 | 0.0188942 |
| genus | Ruminococcaceae UCG-002     | TRADITIONAL | 0.0191028 | 0.0424753 | 0.0305456 | 0.0057140 |
| genus | Ruminococcaceae UCG-002     | WHITE       | 0.0190076 | 0.0103780 | 0.0174045 | 0.0209941 |
| genus | Ruminococcaceae UCG-005     | OIL         | 0.0020813 | 0.0082372 | 0.0354466 | 0.0278833 |
| genus | Ruminococcaceae UCG-005     | TRADITIONAL | 0.0056215 | 0.0273926 | 0.0222159 | 0.0189760 |
| genus | Ruminococcaceae UCG-005     | WHITE       | 0.0116568 | 0.0058658 | 0.0138263 | 0.0269976 |
| genus | Ruminococcaceae UCG-014     | OIL         | 0.0005568 | 0.0216862 | 0.0339900 | 0.0385694 |
| genus | Ruminococcaceae UCG-014     | TRADITIONAL | 0.0008819 | 0.0026613 | 0.0091120 | 0.0539904 |
| genus | Ruminococcaceae UCG-014     | WHITE       | 0.0149211 | 0.0146576 | 0.0223865 | 0.0368309 |
| genus | Streptococcus               | OIL         | 0.0465135 | 0.0075890 | 0.0214326 | 0.0068798 |
| genus | Streptococcus               | TRADITIONAL | 0.0359091 | 0.0301914 | 0.0305630 | 0.0075402 |
| genus | Streptococcus               | WHITE       | 0.0486902 | 0.0148783 | 0.0111496 | 0.0066060 |
