# Supplementary material for: Gut microbiome modifications over time when removing in-feed antibiotics from the prophylaxis of post-weaning diarrhea in piglets
Source: PubMed Central journal article supplement (PMC8901073; doi:10.1371/journal.pone.0262199), 2022-03-07
Supplement: pone.0262199.s005.pdf [file pone.0262199.s005.pdf]

# Gut microbiome modifications over time when removing in-feed antibiotics from the prophylaxis of post-weaning diarrhea in piglets

Paola Cremonesi<sup>1</sup>  et al.\*,

<sup>1</sup> National Research Council, Institute of Biology and Biotechnology in Agriculture (CNR-IBBA), Milan, Italy

 Paola Cremonesi and Filippo Biscarini contributed equally to this work.

\*E-mail: filippo.biscarini@ibba.cnr.it

## Supplementary Material

**S4 Table.** OTUs significantly different between treatments before and after weaning (TR\_pre, TR\_post: traditional diet group, pre and post weaning; WH\_pre, WH\_post: white diet group, pre and post weaning)

| taxa   | OTU                             | p.value | OIL_pre | OIL_post | TR_pre | TR_post | WH_pre | WH_post |
|--------|---------------------------------|---------|---------|----------|--------|---------|--------|---------|
| phylum | Actinobacteria                  | 0.0151  | 116.28  | 133.29   | 211.39 | 150.43  | 106.89 | 106.81  |
| phylum | Elusimicrobia                   | 0.0084  | 3.26    | 7.64     | 0.00   | 3.03    | 2.85   | 23.32   |
| phylum | Fusobacteria                    | 0.0371  | 235.19  | 46.44    | 91.15  | 68.69   | 116.27 | 46.57   |
| class  | Actinobacteria                  | 0.0162  | 72.48   | 47.84    | 129.08 | 64.40   | 63.61  | 28.30   |
| class  | Bacteroidetes VC2.1 Bac22       | 0.0026  | 2.69    | 4.75     | 17.45  | 9.82    | 4.00   | 3.38    |
| class  | Elusimicrobia                   | 0.0084  | 3.26    | 7.64     | 0.00   | 3.03    | 2.85   | 23.32   |
| class  | Fusobacteriia                   | 0.0371  | 235.19  | 46.44    | 91.15  | 68.69   | 116.27 | 46.57   |
| order  | Actinomycetales                 | 0.0118  | 12.10   | 15.45    | 38.38  | 11.04   | 3.94   | 0.22    |
| order  | Aeromonadales                   | 0.0007  | 29.65   | 56.62    | 7.01   | 26.62   | 32.18  | 82.53   |
| order  | Elusimicrobiales                | 0.0084  | 3.26    | 7.64     | 0.00   | 3.03    | 2.85   | 23.32   |
| order  | Fusobacteriales                 | 0.0371  | 235.19  | 46.44    | 91.15  | 68.69   | 116.27 | 46.57   |
| order  | Rhodospirillales                | 0.0002  | 0.78    | 4.05     | 0.00   | 1.25    | 2.58   | 14.52   |
| order  | uncultured rumen bacterium      | 0.0155  | 0.86    | 4.60     | 0.84   | 1.11    | 0.95   | 11.41   |
| family | Actinomycetaceae                | 0.0118  | 12.10   | 15.45    | 38.38  | 11.04   | 3.94   | 0.22    |
| family | CFT112H7                        | 0.0269  | 78.00   | 12.02    | 26.07  | 20.06   | 32.20  | 15.29   |
| family | Clostridiaceae 1                | 0.0138  | 79.91   | 64.43    | 134.94 | 76.41   | 46.91  | 51.74   |
| family | Elusimicrobiaceae               | 0.0084  | 3.26    | 7.64     | 0.00   | 3.03    | 2.85   | 23.32   |
| family | Fusobacteriaceae                | 0.0435  | 134.37  | 31.10    | 57.63  | 40.49   | 67.31  | 28.48   |
| family | Peptostreptococcaceae           | 0.0080  | 42.35   | 35.77    | 74.30  | 42.92   | 41.38  | 29.11   |
| family | Prevotellaceae                  | 0.0486  | 511.06  | 1078.80  | 142.52 | 1178.95 | 574.21 | 1562.38 |
| family | Pseudomonadaceae                | 0.0375  | 12.22   | 12.83    | 6.26   | 9.20    | 20.54  | 13.09   |
| family | Succinivibrionaceae             | 0.0005  | 29.23   | 56.62    | 5.46   | 26.62   | 32.18  | 82.53   |
| family | uncultured rumen bacterium      | 0.0266  | 0.29    | 1.97     | 0.28   | 0.93    | 0.55   | 4.24    |
| genus  | [Eubacterium] ruminantium group | 0.0037  | 1.54    | 13.02    | 0.19   | 8.25    | 7.51   | 24.10   |
| genus  | Actinobacillus                  | 0.0136  | 55.85   | 10.05    | 20.67  | 17.73   | 78.72  | 24.42   |
| genus  | Actinomyces                     | 0.0253  | 8.40    | 11.97    | 28.02  | 6.42    | 3.94   | 0.00    |
| genus  | Alistipes                       | 0.0115  | 15.00   | 16.98    | 54.99  | 29.01   | 20.08  | 19.61   |
| genus  | Anaerobiospirillum              | 0.0022  | 21.80   | 6.24     | 1.49   | 3.25    | 17.29  | 17.39   |
| genus  | Anaerovibrio                    | 0.0058  | 27.90   | 27.24    | 4.31   | 22.14   | 24.26  | 40.73   |
| genus  | Blautia                         | 0.0040  | 38.13   | 97.02    | 83.25  | 116.27  | 38.11  | 82.20   |
| genus  | Candidatus Soleaferrea          | 0.0115  | 1.14    | 8.57     | 1.08   | 4.31    | 4.35   | 8.78    |
| genus  | Clostridium sensu stricto 1     | 0.0158  | 65.95   | 52.79    | 110.26 | 63.17   | 39.34  | 36.65   |
| genus  | Clostridium sensu stricto 2     | 0.0456  | 4.62    | 0.77     | 14.07  | 0.00    | 0.55   | 0.26    |
| genus  | Collinsella                     | 0.0019  | 17.50   | 28.25    | 39.32  | 32.59   | 14.28  | 19.54   |

|       |                              |        |        |        |        |        |        |        |
|-------|------------------------------|--------|--------|--------|--------|--------|--------|--------|
| genus | Dialister                    | 0.0268 | 10.81  | 63.35  | 4.06   | 32.76  | 18.59  | 78.26  |
| genus | Eisenbergiella               | 0.0074 | 5.57   | 3.43   | 9.68   | 6.88   | 3.32   | 1.91   |
| genus | Elusimicrobium               | 0.0084 | 3.26   | 7.64   | 0.00   | 3.03   | 2.85   | 23.32  |
| genus | Enterococcus                 | 0.0255 | 39.94  | 8.12   | 58.28  | 5.55   | 23.37  | 3.27   |
| genus | Fusobacterium                | 0.0452 | 131.86 | 31.10  | 57.63  | 40.19  | 66.07  | 28.21  |
| genus | Haemophilus                  | 0.0096 | 19.26  | 7.41   | 7.28   | 7.46   | 28.12  | 10.17  |
| genus | Hungatella                   | 0.0021 | 2.68   | 1.21   | 18.57  | 4.21   | 5.77   | 0.67   |
| genus | Lachnoclostridium            | 0.0032 | 85.80  | 91.82  | 168.55 | 126.15 | 72.43  | 106.37 |
| genus | Lachnospiraceae FCS020 group | 0.0140 | 4.38   | 11.58  | 14.60  | 18.85  | 6.57   | 20.07  |
| genus | Lachnospiraceae ND3007 group | 0.0250 | 1.30   | 7.06   | 1.04   | 12.86  | 4.99   | 16.01  |
| genus | Lachnospiraceae NK3A20 group | 0.0024 | 4.33   | 14.68  | 6.37   | 10.78  | 16.02  | 19.37  |
| genus | Lachnospiraceae UCG-005      | 0.0088 | 6.98   | 16.62  | 4.24   | 12.24  | 9.69   | 32.56  |
| genus | Lachnospiraceae UCG-010      | 0.0064 | 13.51  | 7.11   | 2.10   | 6.46   | 20.16  | 23.57  |
| genus | Megamonas                    | 0.0208 | 8.93   | 19.46  | 10.06  | 57.23  | 8.36   | 17.11  |
| genus | Mitsuokella                  | 0.0001 | 6.19   | 22.85  | 1.32   | 14.93  | 13.46  | 45.28  |
| genus | Odoribacter                  | 0.0466 | 9.10   | 1.30   | 1.35   | 4.73   | 13.63  | 6.92   |
| genus | Oribacterium                 | 0.0001 | 23.85  | 38.32  | 3.66   | 19.09  | 23.30  | 55.88  |
| genus | Parasutterella               | 0.0247 | 6.02   | 2.71   | 6.17   | 16.77  | 0.00   | 1.32   |
| genus | Pasteurella                  | 0.0068 | 34.89  | 18.35  | 14.13  | 27.58  | 9.14   | 12.99  |
| genus | Peptoclostridium             | 0.0091 | 13.90  | 13.68  | 31.15  | 19.94  | 13.23  | 15.27  |
| genus | Prevotella 1                 | 0.0234 | 27.09  | 58.21  | 5.08   | 117.98 | 46.35  | 140.51 |
| genus | Prevotella 2                 | 0.0320 | 169.51 | 178.52 | 35.66  | 153.22 | 142.27 | 235.95 |
| genus | Prevotella 7                 | 0.0378 | 37.80  | 104.49 | 8.60   | 81.52  | 38.99  | 122.77 |
| genus | Prevotellaceae NK3B31 group  | 0.0161 | 33.23  | 88.99  | 23.86  | 121.64 | 60.23  | 173.24 |
| genus | Prevotellaceae UCG-001       | 0.0002 | 15.32  | 41.18  | 3.17   | 35.11  | 19.64  | 59.19  |
| genus | Prevotellaceae UCG-003       | 0.0121 | 7.65   | 18.82  | 1.16   | 18.71  | 9.10   | 33.17  |
| genus | Prevotellaceae UCG-004       | 0.0029 | 5.17   | 11.98  | 2.70   | 5.05   | 8.42   | 17.02  |
| genus | Pseudomonas                  | 0.0243 | 10.90  | 12.33  | 4.96   | 8.17   | 17.85  | 12.67  |
| genus | Ruminococcaceae UCG-004      | 0.0076 | 3.24   | 5.25   | 9.27   | 9.43   | 3.78   | 7.53   |
| genus | Ruminococcaceae UCG-011      | 0.0017 | 9.13   | 7.61   | 1.82   | 4.32   | 11.75  | 13.17  |
| genus | Ruminococcus 1               | 0.0065 | 10.62  | 56.67  | 17.06  | 37.95  | 28.75  | 89.79  |
| genus | Rummeliibacillus             | 0.0437 | 3.39   | 0.00   | 3.28   | 0.18   | 12.36  | 0.43   |
| genus | Selenomonas                  | 0.0169 | 0.28   | 15.31  | 0.18   | 7.03   | 3.11   | 21.15  |
| genus | Succinivibrio                | 0.0385 | 2.34   | 43.52  | 3.60   | 20.63  | 7.73   | 53.46  |
| genus | Treponema 2                  | 0.0200 | 3.08   | 28.24  | 2.21   | 14.20  | 12.28  | 28.41  |
| genus | Trueperella                  | 0.0429 | 3.69   | 3.48   | 10.36  | 4.62   | 0.00   | 0.22   |
